# Supplementary material for: Stingless bee honey, a novel source of trehalulose: a biologically active disaccharide with health benefits
Source: PubMed Central journal article supplement (PMC7376065; doi:10.1038/s41598-020-68940-0), 2020-07-22
Supplement: 41598_2020_68940_MOESM1_ESM.pdf [file 41598_2020_68940_MOESM1_ESM.pdf]

# **Stingless Bee Honey, a Novel Source of Trehalulose: A Biologically Active Disaccharide with Health Benefits**

Mary T. Fletcher,<sup>1\*</sup> Natasha L. Hungerford,<sup>1</sup> Dennis Webber,<sup>2</sup> Matheus Carpinelli de Jesus,<sup>3</sup> Jiali Zhang,<sup>1</sup> Isobella S.J. Stone,<sup>2,3</sup> Joanne T. Blanchfield,<sup>3</sup> Norhasnida Zawawi.<sup>4,1\*</sup>

<sup>1</sup>Queensland Alliance for Agriculture and Food Innovation (QAAFI), The University of Queensland, Brisbane, QLD 4072.

<sup>2</sup>Biosecurity Queensland, Department of Agriculture and Fisheries, Brisbane, QLD 4108, Australia.

<sup>3</sup>School of Chemistry and Molecular Biosciences, The University of Queensland, Brisbane, QLD 4072.

<sup>4</sup>Department of Food Science, Faculty of Food Science and Technology, Universiti Putra Malaysia, 43400 Serdang, Selangor, Malaysia

\*email: [mary.fletcher@uq.edu.au](mailto:mary.fletcher@uq.edu.au);

[norhasnida@upm.edu.my](mailto:norhasnida@upm.edu.my)

## Supporting Information

### Table of Contents

|                                                                                                                                                                                                                                |    |
|--------------------------------------------------------------------------------------------------------------------------------------------------------------------------------------------------------------------------------|----|
| <b>Fig. S1:</b> $^1\text{H}$ NMR spectrum of trehalulose ( <b>1</b> ) isolated from <i>Geniotrigona thoracica</i> in $\text{D}_2\text{O}$ (500 MHz)                                                                            | 3  |
| <b>Fig. S2:</b> $^{13}\text{C}$ NMR spectrum of trehalulose ( <b>1</b> ) isolated from <i>Geniotrigona thoracica</i> in $\text{D}_2\text{O}$ (125 MHz) with 1,4-dioxane ( $\delta 67.4$ ) for $^{13}\text{C}$ reference        | 3  |
| <b>Fig. S3:</b> $^{13}\text{C}$ NMR DEPT45 spectrum of trehalulose ( <b>1</b> ) isolated from <i>Geniotrigona thoracica</i> in $\text{D}_2\text{O}$ (125 MHz) with 1,4-dioxane ( $\delta 67.4$ ) for $^{13}\text{C}$ reference | 4  |
| <b>Fig. S4:</b> COSY spectrum of trehalulose ( <b>1</b> ) in $\text{D}_2\text{O}$ (500 MHz)                                                                                                                                    | 4  |
| <b>Fig. S5:</b> 2D TOCSY spectrum of trehalulose ( <b>1</b> ) in $\text{D}_2\text{O}$ (500 MHz)                                                                                                                                | 5  |
| <b>Fig. S6:</b> 2D TOCSY spectrum of trehalulose ( <b>1</b> ) in $\text{D}_2\text{O}$ (500 MHz), expanded to show signals of less abundant conformer                                                                           | 5  |
| <b>Fig. S7:</b> HSQC spectrum of trehalulose ( <b>1</b> ) in $\text{D}_2\text{O}$ (500 MHz)                                                                                                                                    | 6  |
| <b>Fig. S8:</b> HMBC spectrum of trehalulose ( <b>1</b> ) in $\text{D}_2\text{O}$ (500 MHz)                                                                                                                                    | 6  |
| <b>Fig. S9:</b> HMBC spectrum of trehalulose ( <b>1</b> ) in $\text{D}_2\text{O}$ (500 MHz), expansion of $\text{H1}'\text{-C1}$ correlation                                                                                   | 7  |
| <b>Fig. S10:</b> HMBC spectrum of trehalulose ( <b>1</b> ) in $\text{D}_2\text{O}$ (500 MHz), $\text{H1b-C1}'$ (left), $\text{H6-C2}$ (Centre), $\text{H1a-C1}'$ (right)                                                       | 7  |
| <b>Fig. S11:</b> 1D TOCSY spectrum of trehalulose ( <b>1</b> ) in $\text{D}_2\text{O}$ (500 MHz), O1 2455.53, chemical shift at 5.01 ppm irradiated                                                                            | 8  |
| <b>Fig. S12:</b> 1D TOCSY spectrum of trehalulose ( <b>1</b> ) in $\text{D}_2\text{O}$ (500 MHz), O1 2447.27, chemical shift at 4.98 ppm irradiated                                                                            | 8  |
| <b>Fig. S13:</b> 1D TOCSY spectrum of trehalulose ( <b>1</b> ) in $\text{D}_2\text{O}$ (500 MHz), O1 1982.27, chemical shift at 4.08 ppm irradiated                                                                            | 9  |
| <b>Fig. S14:</b> 1D TOCSY spectrum of trehalulose ( <b>1</b> ) in $\text{D}_2\text{O}$ (500 MHz), O1 1961.82, chemical shift at 4.02 ppm irradiated                                                                            | 9  |
| <b>Fig. S15:</b> 1D TOCSY spectrum of trehalulose ( <b>1</b> ) in $\text{D}_2\text{O}$ (500 MHz), O1 1742.11, chemical shift at 3.59 ppm irradiated                                                                            | 10 |
| <b>Fig. S16:</b> 1D TOCSY spectrum of trehalulose ( <b>1</b> ) in $\text{D}_2\text{O}$ (500 MHz), O1 1687.46, chemical shift at 3.48 ppm irradiated                                                                            | 10 |
| <b>Fig. S17:</b> 1D TOCSY spectrum of trehalulose ( <b>1</b> ) in $\text{D}_2\text{O}$ (500 MHz), O1 1669.85, chemical shift at 3.44 ppm irradiated                                                                            | 11 |

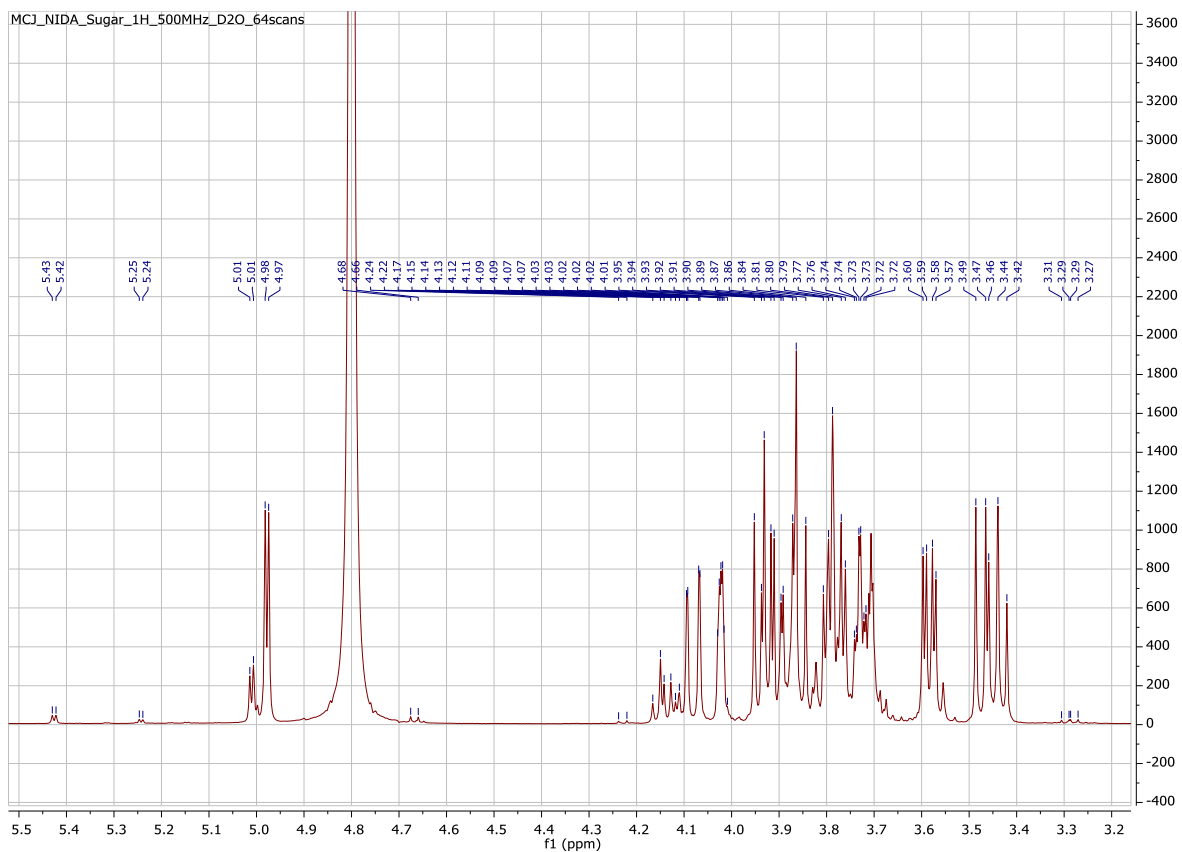

**Fig. S1:**  $^1\text{H}$  NMR spectrum of trehalulose (**1**) isolated from *Geniotrigona thoracica* in  $\text{D}_2\text{O}$  (500 MHz)

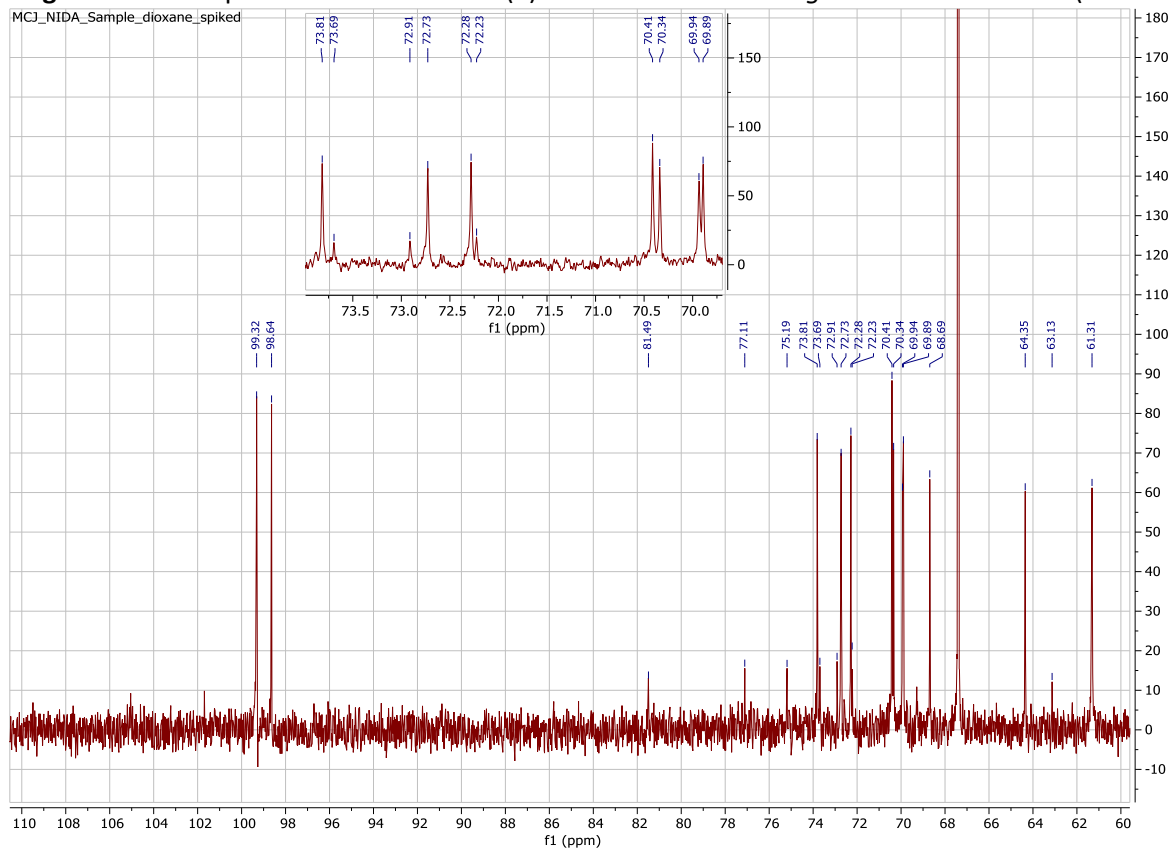

**Fig. S2:**  $^{13}\text{C}$  NMR spectrum of trehalulose (**1**) isolated from *Geniotrigona thoracica* in  $\text{D}_2\text{O}$  (125 MHz) with 1,4-dioxane ( $\delta 67.4$ ) for  $^{13}\text{C}$  reference

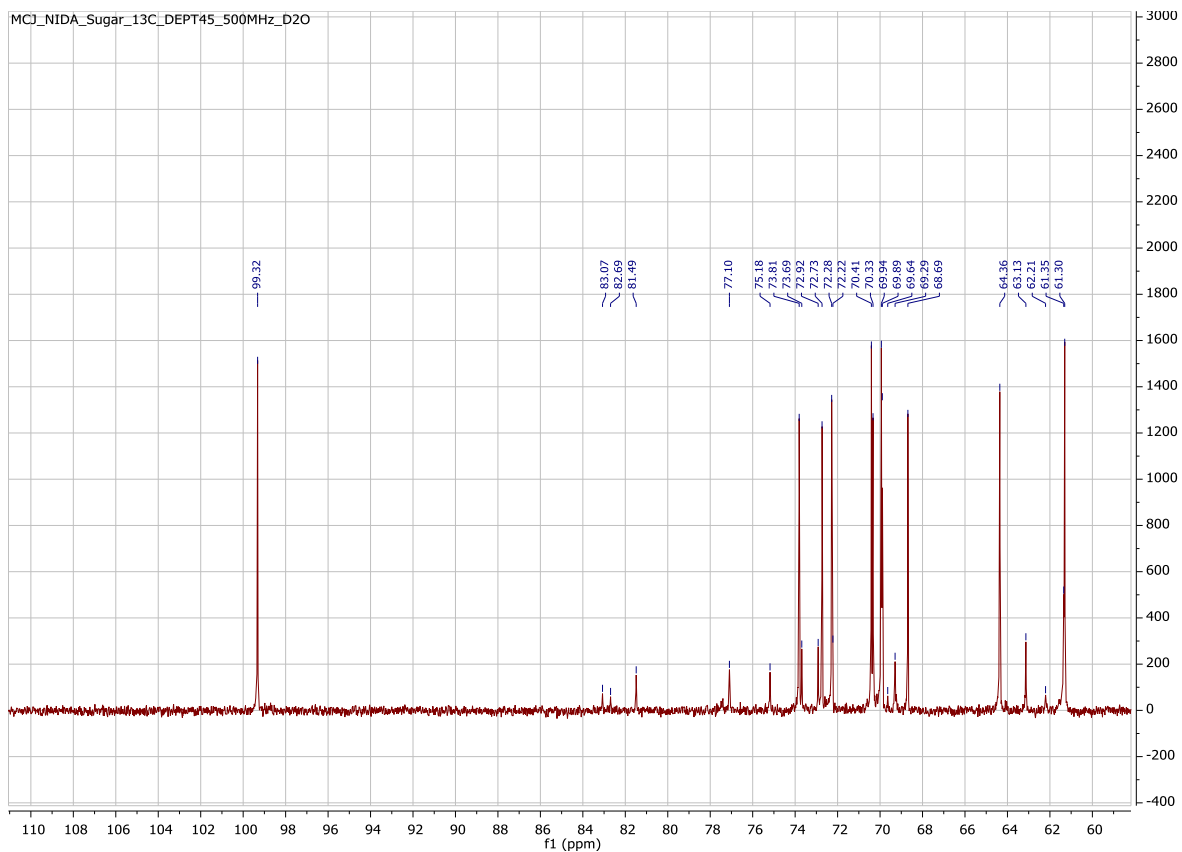

**Fig. S3:**  $^{13}\text{C}$  NMR DEPT45 spectrum of trehalulose (**1**) isolated from *Geniotrigena thoracica* in  $\text{D}_2\text{O}$  (125 MHz) with 1,4-dioxane ( $\delta_{67.4}$ ) for  $^{13}\text{C}$  reference

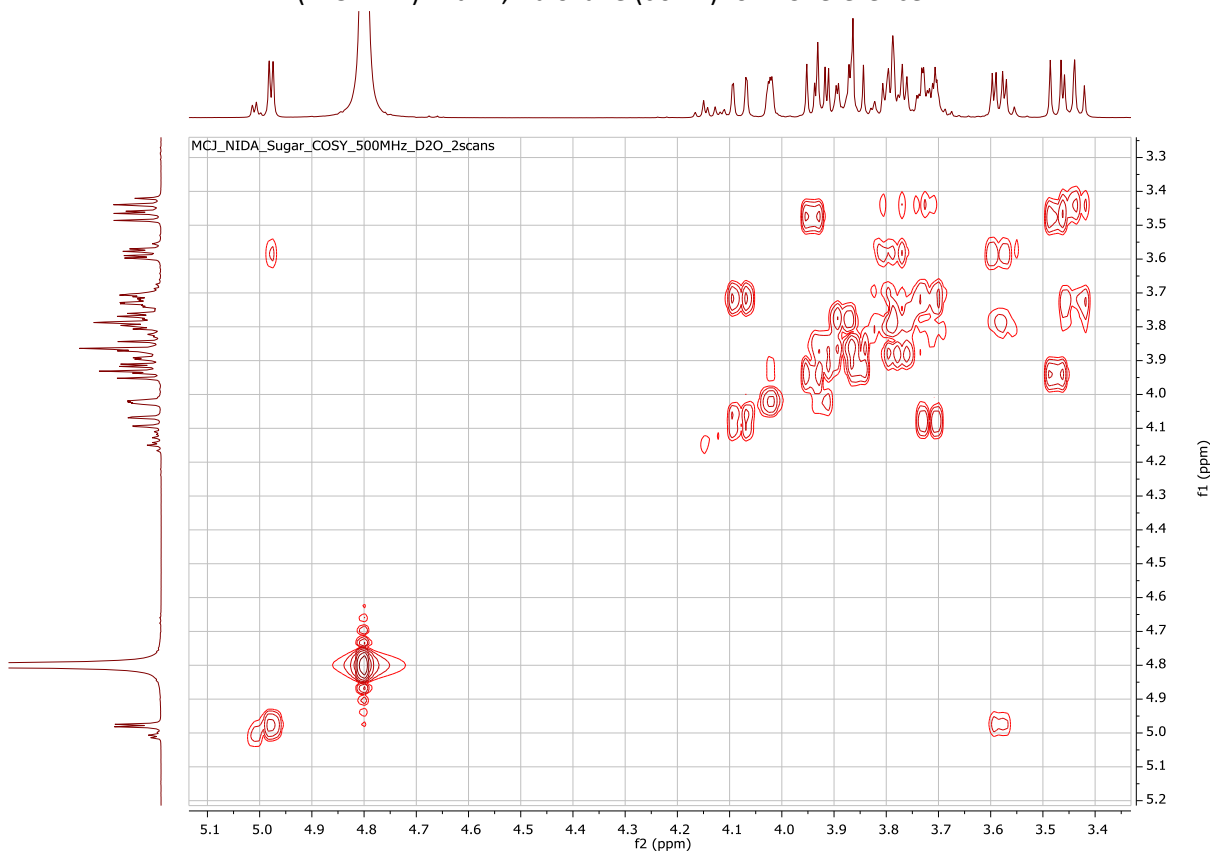

**Fig. S4:** COSY spectrum of trehalulose (**1**) in  $\text{D}_2\text{O}$  (500 MHz)

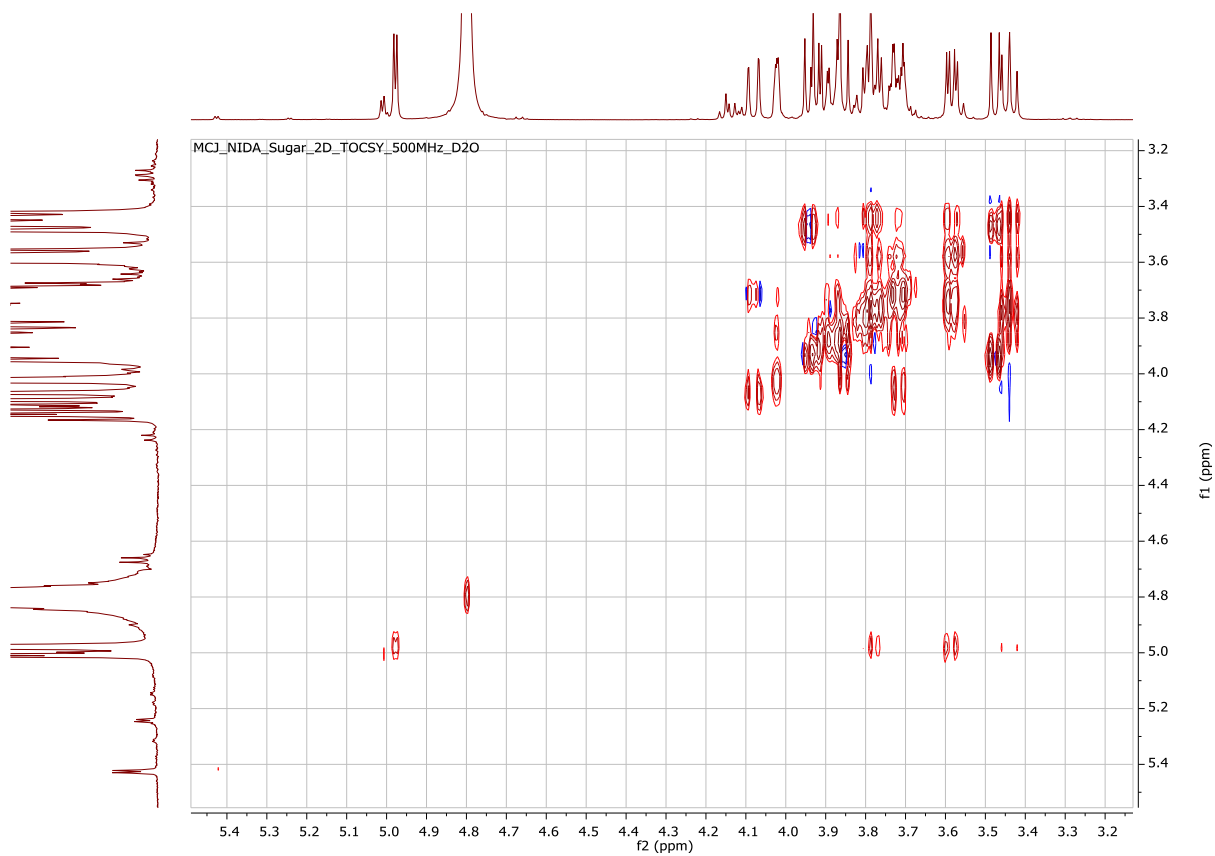

**Fig. S5:** 2D TOCSY spectrum of trehalulose (**1**) in  $D_2O$  (500 MHz)

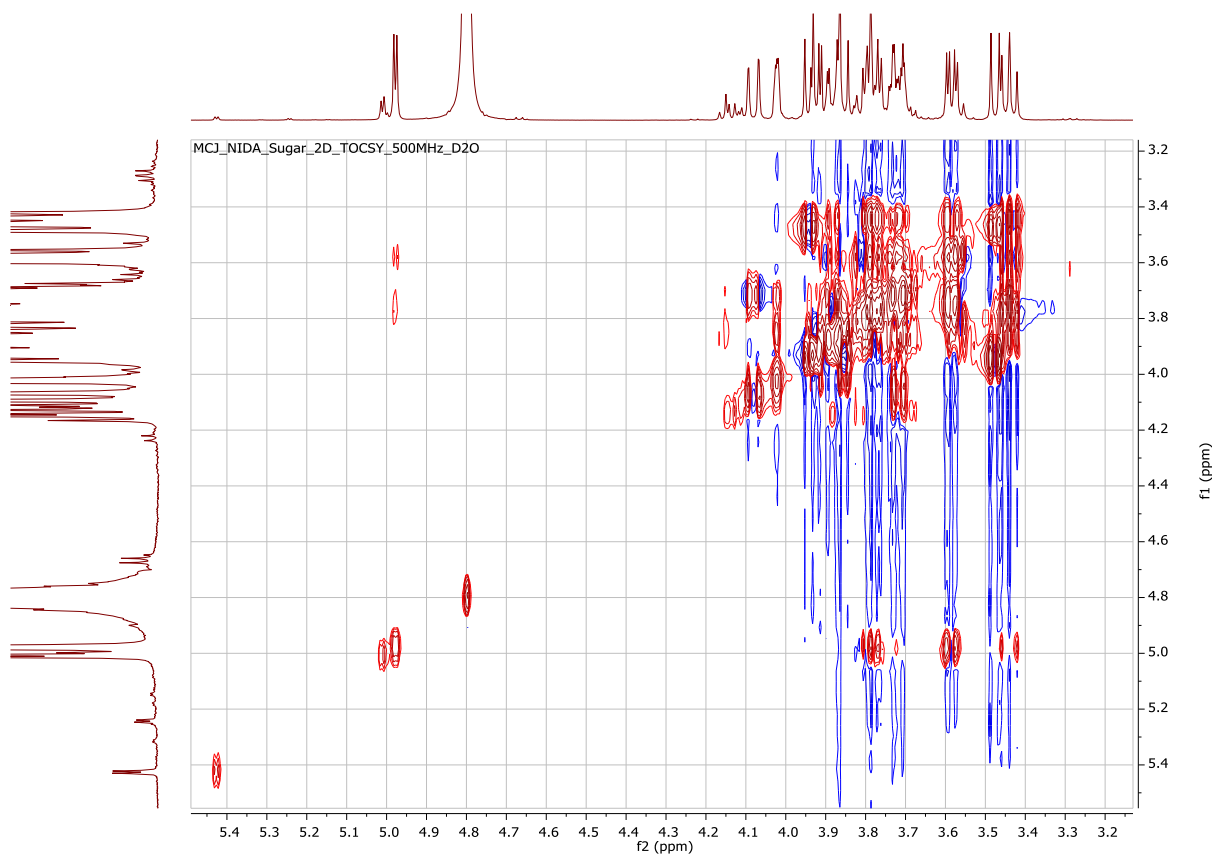

**Fig. S6:** 2D TOCSY spectrum of trehalulose (**1**) in  $D_2O$  (500 MHz), expanded to show signals of less abundant conformer

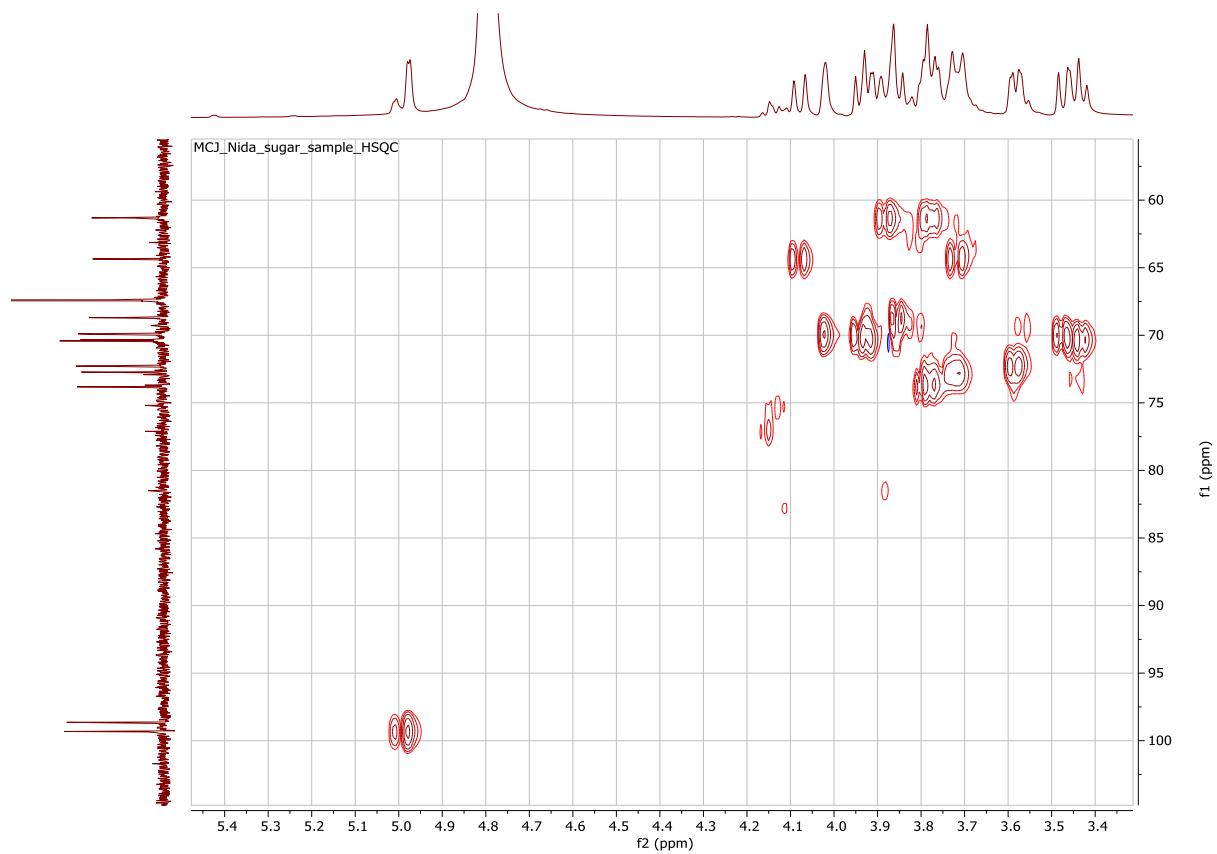

**Fig. S7:** HSQC spectrum of trehalulose (**1**) in D<sub>2</sub>O (500 MHz)

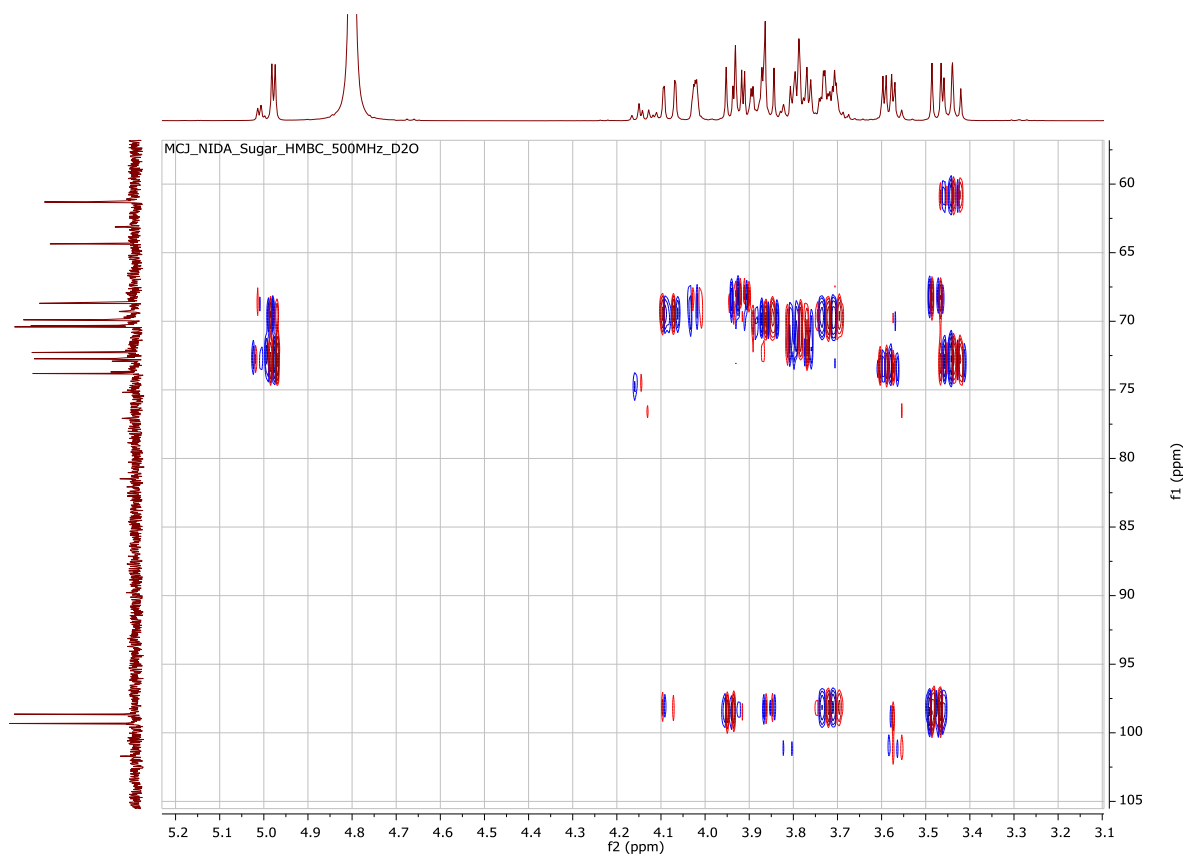

**Fig. S8:** HMBC spectrum of trehalulose (**1**) in D<sub>2</sub>O (500 MHz)

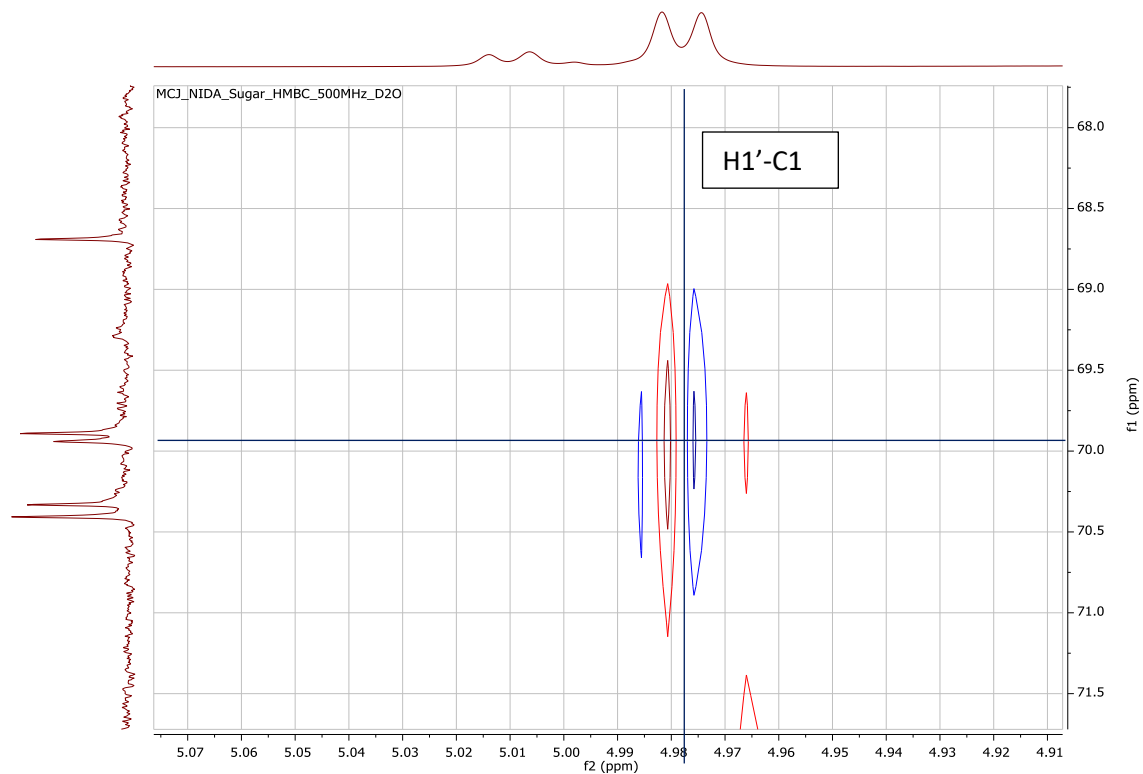

**Fig. S9:** HMBC spectrum of trehalulose (**1**) in  $D_2O$  (500 MHz), expansion of H1'-C1 correlation

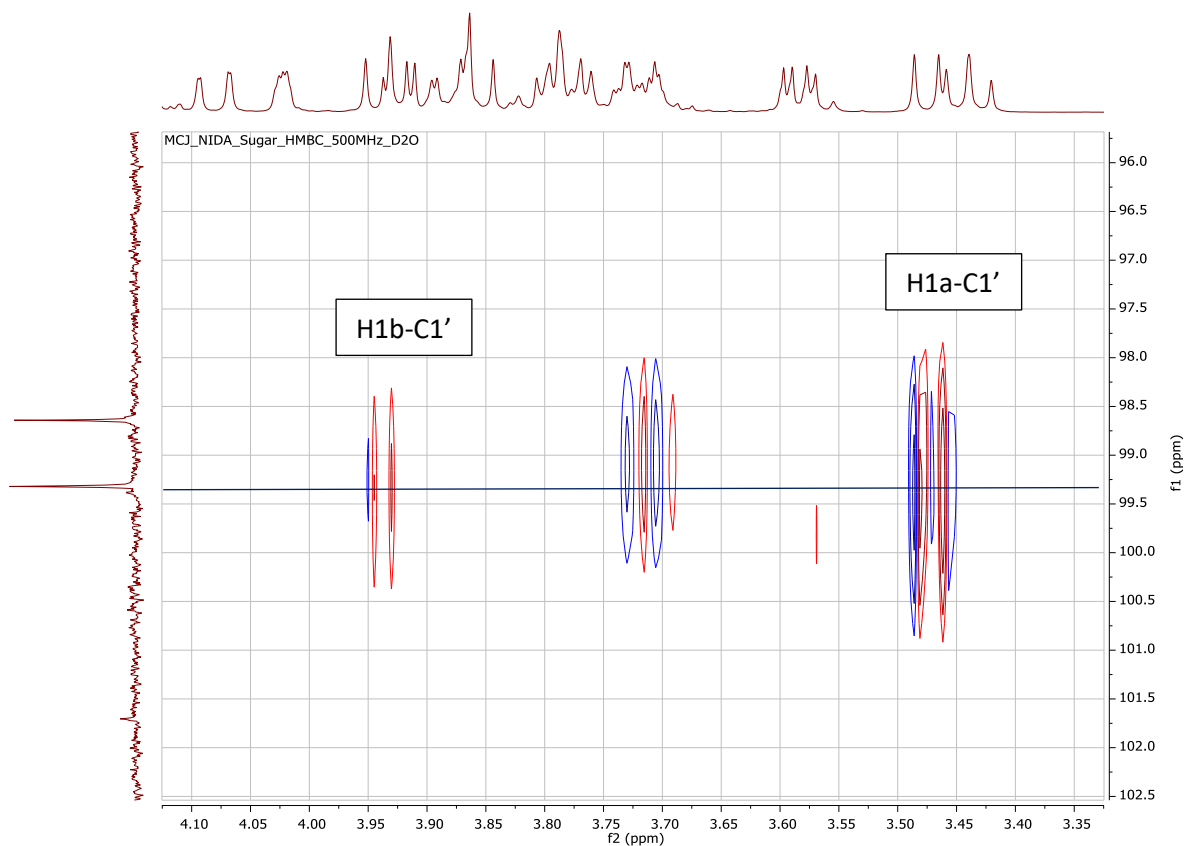

**Fig. S10:** HMBC spectrum of trehalulose (**1**) in  $D_2O$  (500 MHz), H1b-C1' (left), H6-C2 (Centre), H1a-C1' (right)

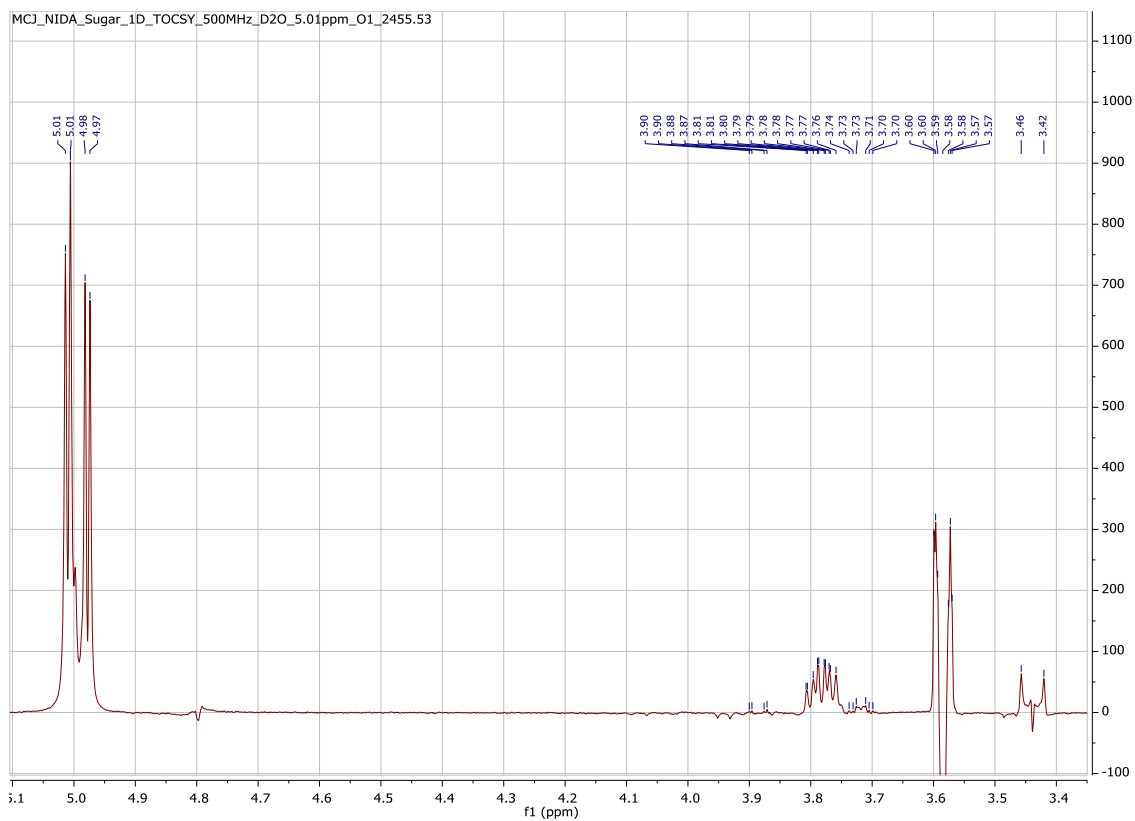

**Fig. S11:** 1D TOCSY spectrum of trehalulose (**1**) in  $D_2O$  (500 MHz), O1 2455.53, chemical shift at 5.01 ppm irradiated

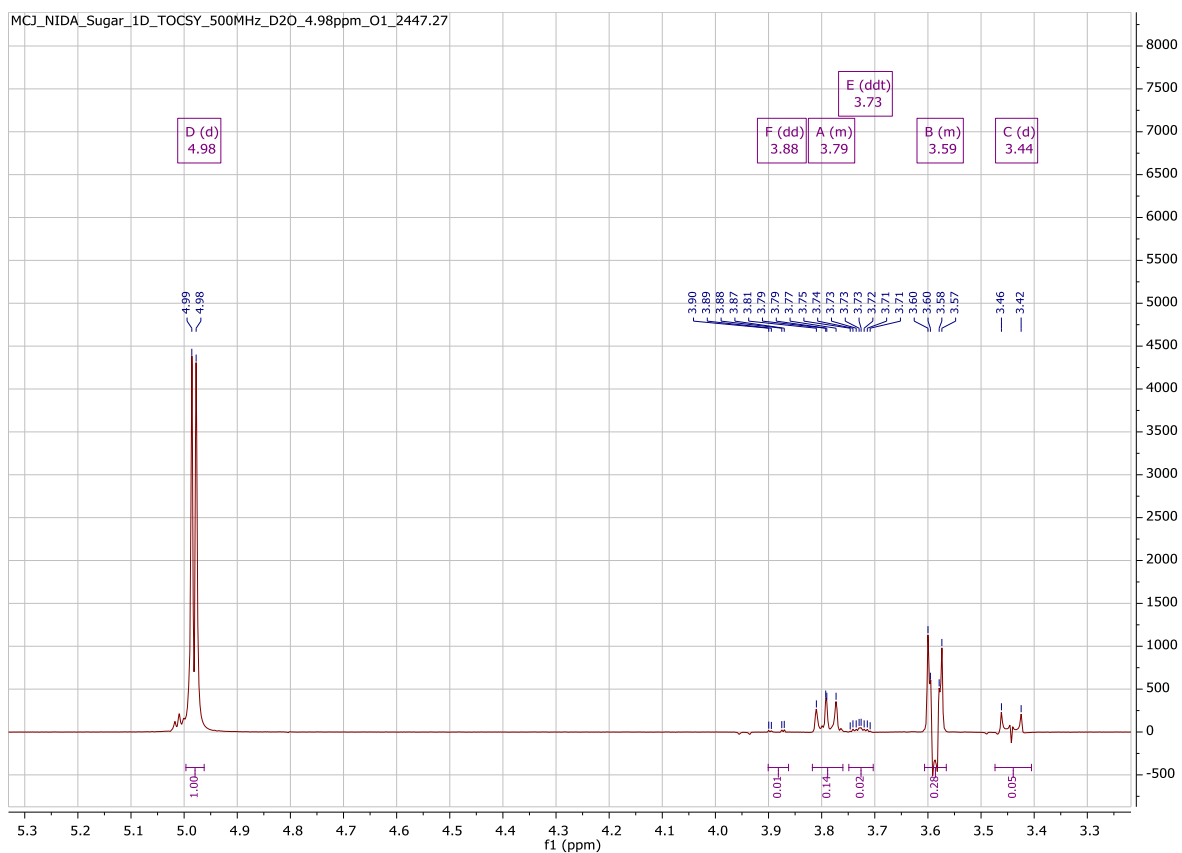

**Fig. S12:** 1D TOCSY spectrum of trehalulose (**1**) in  $D_2O$  (500 MHz), O1 2447.27, chemical shift at 4.98 ppm irradiated



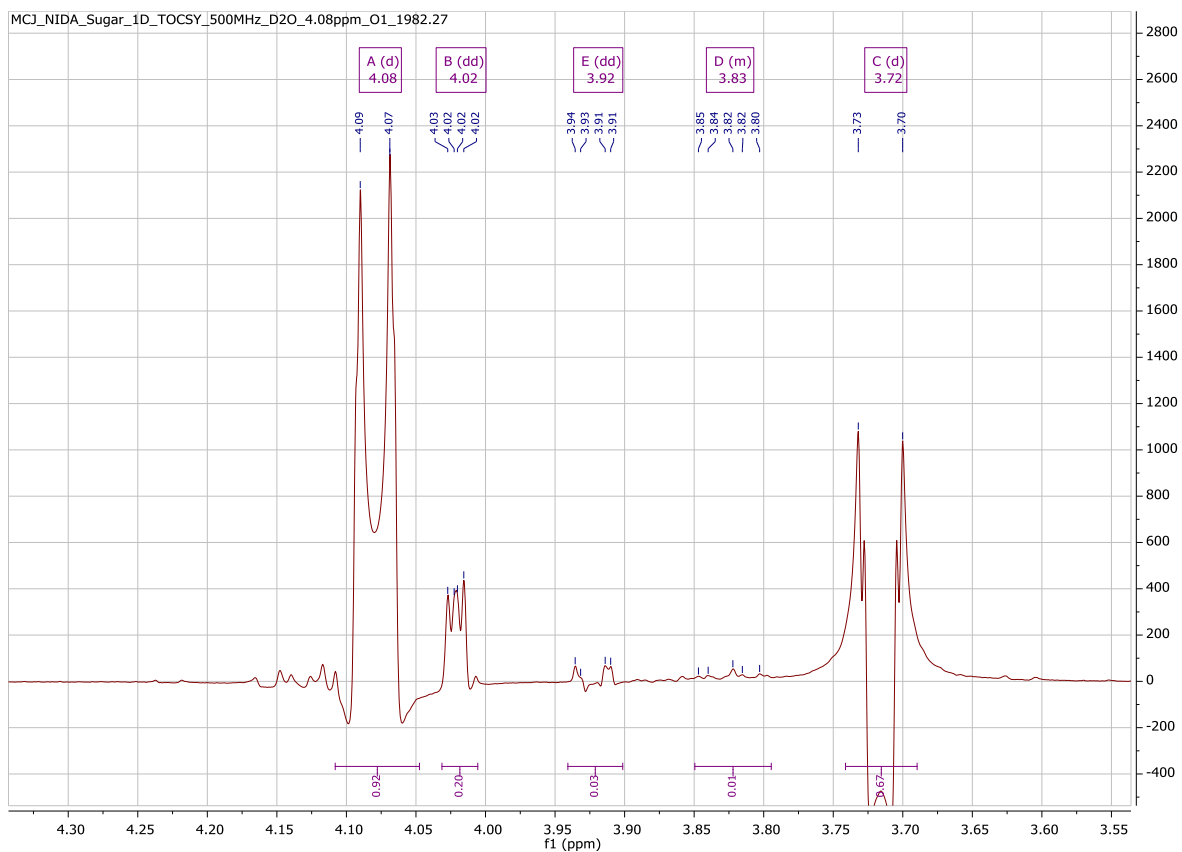

**Fig. S13:** 1D TOCSY spectrum of trehalulose (**1**) in  $D_2O$  (500 MHz), O1 1982.27, chemical shift at 4.08 ppm irradiated

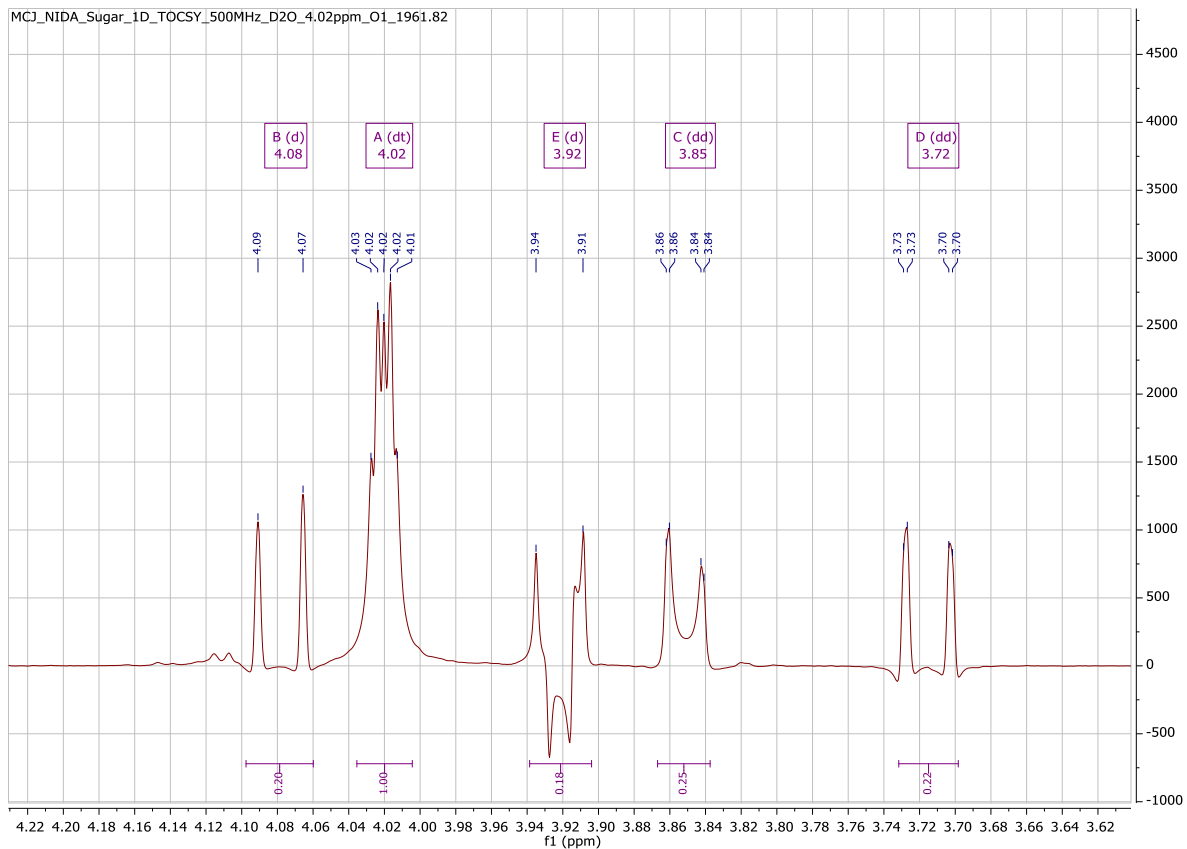

**Fig. S14:** 1D TOCSY spectrum of trehalulose (**1**) in  $D_2O$  (500 MHz), O1 1961.82, chemical shift at 4.02 ppm irradiated

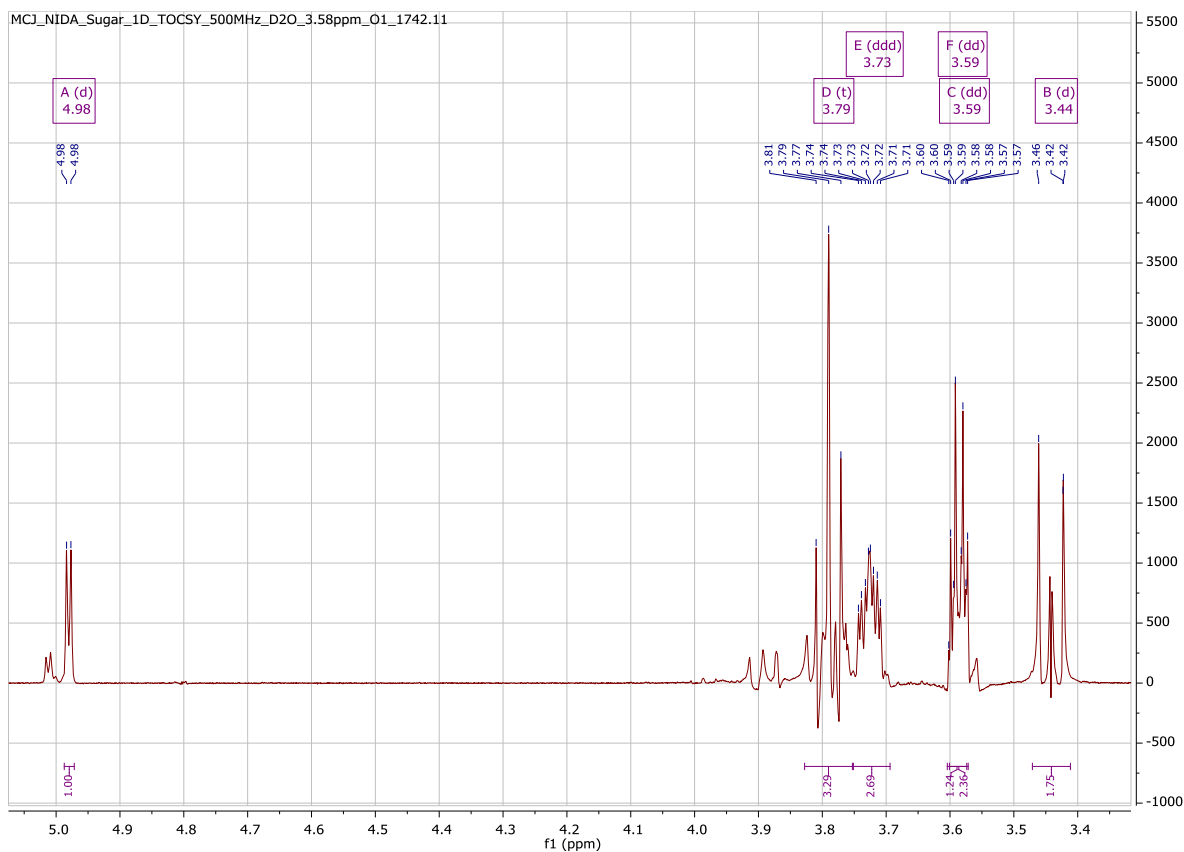

**Fig. S15:** 1D TOCSY spectrum of trehalulose (**1**) in  $D_2O$  (500 MHz), O1 1742.11, chemical shift at 3.59 ppm irradiated

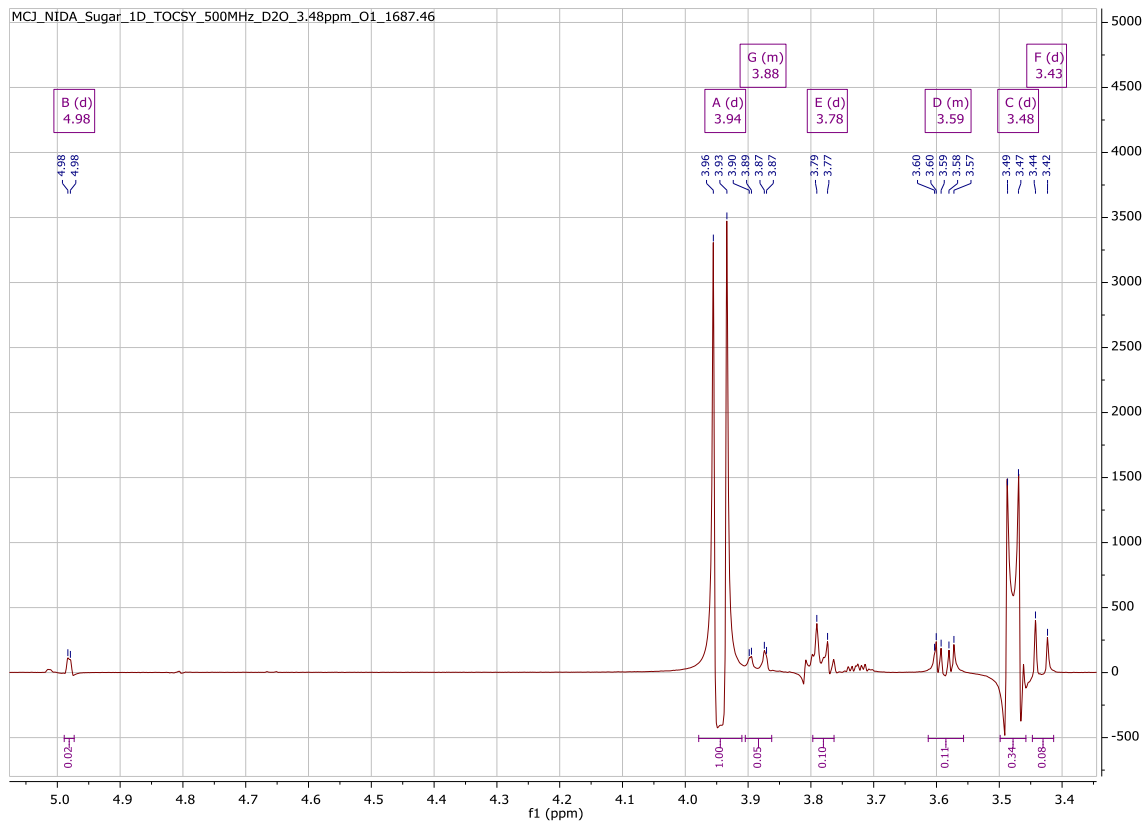

**Fig. S16:** 1D TOCSY spectrum of trehalulose (**1**) in  $D_2O$  (500 MHz), O1 1687.46, chemical shift at 3.48 ppm irradiated

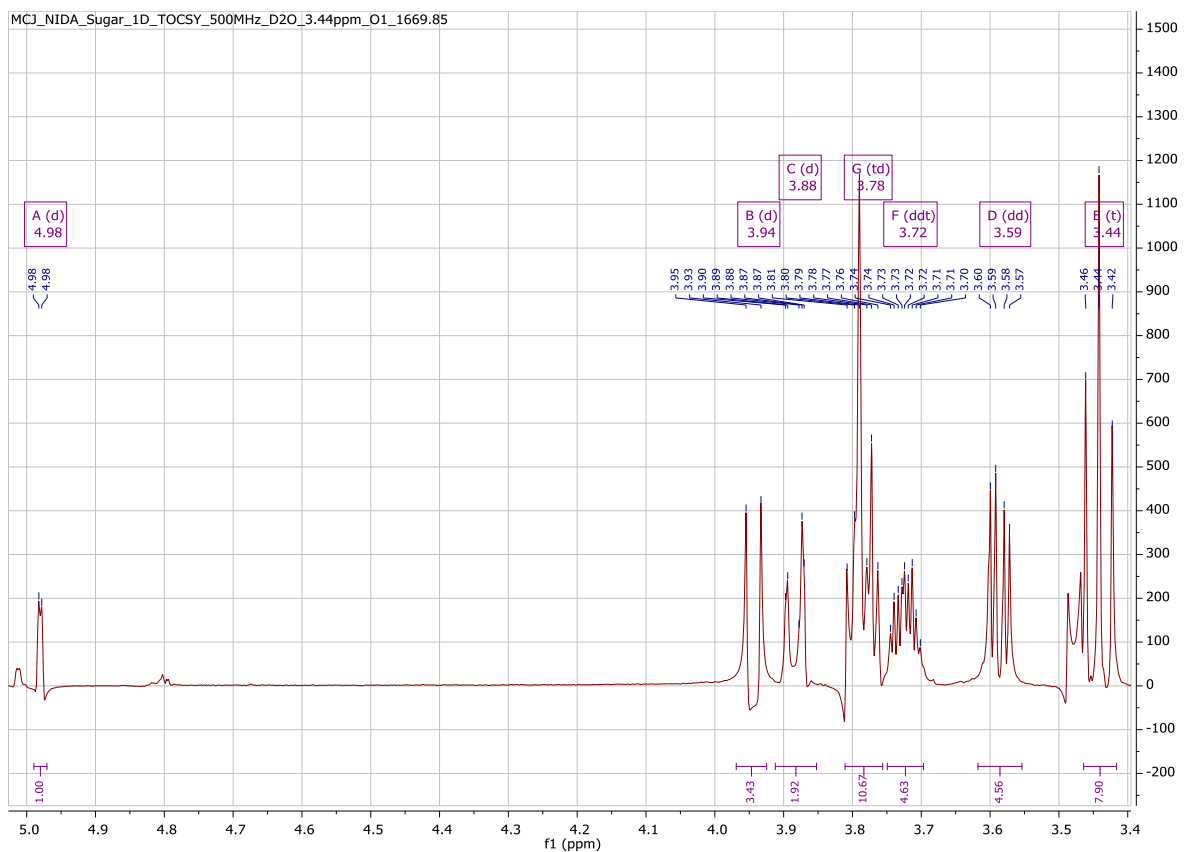

**Fig. S17:** 1D TOCSY spectrum of trehalulose (**1**) in D<sub>2</sub>O (500 MHz), O1 1669.85, chemical shift at 3.44 ppm irradiated
